# Supplementary material
Source: publisher site journal article supplement (https://evolsyst.pensoft.net/article/63674/download/suppl/32/)
Supplement: Supplementary file 1

**Appendix 2. Genbank accession codes for specimens considered for phylogenetic analyses.**

| **Species** | **Voucher** | **Field Series** | **16S** | **COI** | **RAG1** | **Location** |
| --- | --- | --- | --- | --- | --- | --- |
| *Oreobates gemcare* | MUSM 27903 | AC 137.07 | KY652648 | KY672981 | KY672964 | Peru: Cusco: Paucartambo: Kosñipata |
| *Oreobates granulosus* | NA | AC 94.07 | KY652649 | KY672982 | KY672965 | Peru: Cusco: Paucartambo: Kosñipata |
| *Pristimantis altamazonicus* | CORBIDI 11854 | AC 108.12 | MW540608 | NA | NA | Peru: Cusco: Paucartambo: Kosñipata |
| *Pristimantis altamazonicus* | KU 215460 |  | EF493670 | NA | EF493441 | Peru: Madre de Dios, Cuzco Amazonico |
| *Pristimantis altamazonicus* | QCAZ 28011 |  | MF118694 | MF118710 | MF118731 | Ecuador |
| *Pristimantis altamazonicus* | QCAZ 28482 |  | MF118696 | MF118712 | MF118733 | Ecuador |
| *Pristimantis altamazonicus* | QCAZ 51104 |  | MF118678 | MF118720 | MF118738 | Ecuador |
| *Pristimantis altamazonicus* | QCAZ 52851 |  | MF118689 | MF118724 | MF118732 | Ecuador |
| *Pristimantis antisuyu* | CORBIDI 16207 | AC 37.13 | MG820147 | MG820172 | MW805287 | Peru: Cusco: Paucartambo: Kosñipata |
| *Pristimantis antisuyu* | CORBIDI 16737 | AC 42.13 | MG820149 | MG820174 | MW805288 | Peru: Cusco: Paucartambo: Kosñipata |
| *Pristimantis antisuyu* | CORBIDI 16738 | AC 43.13 | MG820150 | MG820175 | MW805289 | Peru: Cusco: Paucartambo: Kosñipata |
| *Pristimantis antisuyu* | CORBIDI 16739 | AC 50.13 | MG820151 | MG820176 | MW805290 | Peru: Cusco: Paucartambo: Kosñipata |
| *Pristimantis antisuyu* | CORBIDI 18727 | AC 31.14 | MG820148 | MG820173 | MW805291 | Peru: Cusco: Paucartambo: Kosñipata |
| *Pristimantis ashaninka* | NMP6V 75063 |  | KY006110 | NA | NA | Peru: Junín, Pui Pui |
| *Pristimantis ashaninka* | NMP6V 75064 |  | KY006111 | NA | NA | Peru: Junín, Pui Pui |
| *Pristimantis ashaninka* | NMP6V 75065 |  | KY006112 | NA | NA | Peru: Junín, Pui Pui |
| *Pristimantis brevicrus* | QCAZ 46390 |  | MF118683 | MF118718 | MF118739 | Ecuador: Morona Santiago, Napimias, 642 m. |
| *Pristimantis boucephalus* | MUSM 31102 |  | KY006091 | NA | NA | Peru: Pasco, Yanachaga-Chemillen |
| *Pristimantis buccinator* | CORBIDI 16299 | EB 21.13 | MG820139 | MG820164 | NA | Peru: Cusco: Paucartambo: Kosñipata |
| *Pristimantis* cf. *carvalhoi* | CORBIDI 16294 | EB 16.13 | KY652651 | KY672983 | KY672967 | Peru: Cusco: Paucartambo: Kosñipata |
| *Pristimantis* cf. *mendax* | MUSM 31157 |  | KY628996 | KY962786 | KY962766 | Peru: Cusco: Paucartambo: Kosñipata |
| *Pristimantis croceoinguinis* | QCAZ 53532 |  | KP064144 | KP064157 | MF118752 | Ecuador: Pastaza, Juyuintza |
| *Pristimantis croceoinguinis* | QCAZ 25788 |  | MH516176 | NA | NA | Ecuador: Sucumbios |
| *Pristimantis cruciocularis* | NMP6V75535 |  | KY594760 | KY962788 | KY962768 | Peru: Junín, Pui Pui Protected Forest, Hito 3, park entrance |
| *Pristimantis cruciocularis* | MTD 45636 | MTD 1125b | MG820154 | MG820179 | MW805292 | Peru: Junín, Distrito de Huasahuasi, Pampa Hermosa |
| *Pristimantis cruciocularis* | MUSM 32731 | IWU 365 | MG820156 | MG820181 | MW805293 | Peru: Junín, Pui Pui Protected forest, trail 1 (close to river) |
| *Pristimantis danae* | MVZ 272358 | AC 150.07 | KY652652 | KY672984 | KY672968 | Peru: Cusco: Paucartambo: Kosñipata |
| *Pristimantis erythroinguinis* | CORBIDI 16240 | 117.13 | MG820141 | MG820166 | MW805294 | Peru: Cusco: Paucartambo: Kosñipata |
| *Pristimantis erythroinguinis* | CORBIDI 16777 | 119.13 | MG820142 | MG820167 | MW805295 | Peru: Cusco: Paucartambo: Kosñipata |
| *Pristimantis erythroinguinis* | CORBIDI 16778 | 120.13 | MG820143 | MG820168 | MW805296 | Peru: Cusco: Paucartambo: Kosñipata |
| *Pristimantis erythroinguinis* | CORBIDI 16779 | 121.13 | MG820144 | MG820169 | MW805297 | Peru: Cusco: Paucartambo: Kosñipata |
| *Pristimantis erythroinguinis* | CORBIDI 16780 | 122.13 | MG820145 | MG820170 | MW805298 | Peru: Cusco: Paucartambo: Kosñipata |
| *Pristimantis lindae* | MUSM 27902 | AC 144.07 | KY652653 | KY672985 | KY672969 | Peru: Cusco: Paucartambo: Kosñipata |
| *Pristimantis llojsintuta* | MNK-A 7210 |  | EU712635 | NA | NA | Bolivia: Santa Cruz, Paredones del Amboro, Parque Natural Amboro-Florida |
| *Pristimantis llojsintuta* | MNK-A 6608 |  | EU712634 | NA | NA | Bolivia: Santa Cruz, La Yunga de Mairana, Florida |
| *Pristimantis llojsintuta* | MNCN 43014 |  | EU712640 | NA | NA | Bolivia: Santa Cruz, La Yunga de Mairana, Florida |
| *Pristimantis llojsintuta* | ZFMK 66387 |  | EU712641 | NA | NA | Bolivia: Cochabamba, Sehuencas, Carrasco |
| *Pristimantis olivaceus* | TBA | AC 5.15 | KX155579 | NA | NA | Peru: Cusco: Paucartambo: Kosñipata |
| *Pristimantis pharangobates* | MVZ272360 | AC 163.07 | KY652655 | KY672987 | KY681088 | Peru: Cusco: Paucartambo: Kosñipata |
| *Pristimantis platydactylus* | CORBIDI 16353 | AC 76.14 | MG820160 | MG820185 | MW805299 | Peru: Cusco: Paucartambo: Kosñipata |
| *Pristimantis platydactylus* | CORBIDI 16769 | AC 110.13 | MG820159 | MG820184 | NA | Peru: Cusco: Paucartambo: Kosñipata |
| *Pristimantis platydactylus* | MVZ 272359 | AC 203.07 | KY652656 | KY672988 | KY672971 | Peru: Cusco: Paucartambo: Kosñipata |
| *Pristimantis platydactylus* | MNCN 42994 |  | EU712644 | NA | NA | Bolivia: Cochabamba, La Siberia |
| *Pristimantis platydactylus* | MNCN 43003 |  | EU192284 | NA | NA | Bolivia: Cochabamba, Sehuencas |
| *Pristimantis platydactylus* | MNK-A 6598 |  | EU712653 | NA | NA | Bolivia: Santa Cruz, Camino entre el Empalme y Carahuasi |
| *Pristimantis platydactylus* | MBH 5746 |  | NA | JN991394 | NA | Bolivia: La Paz, Caranavi, Serranía de Bella Vista, Near town of Kilometro 52 |
| *Pristimantis pluvialis* | CORBIDI 16695 | AC 4.14 | KX155578 | KX155583 | KY962770 | Peru: Cusco: Paucartambo: Kosñipata |
| *Pristimantis reichlei* | CORBIDI 16219 | AC 57.13 | KY652657 | KY672989 | KY672972 | Peru: Cusco: Paucartambo: Kosñipata |
| *Pristimantis salaputium* | CORBIDI 16740 | AC 55.13 | MW540609 | NA | NA | Peru: Cusco: Paucartambo: Kosñipata |
| *Pristimantis salaputium* | MUSM 27916 | AC 95.07 | KY652658 | KY672990 | KY672973 | Peru: Cusco: Paucartambo: Kosñipata |
| *Pristimantis salaputium* | CORBIDI 16789 | BL 20.13 | MG820158 | MG820183 | MW805300 | Peru: Cusco: Paucartambo: Kosñipata |
| *Pristimantis salaputium* | CORBIDI 16782 | BL 7.13 | MG820157 | MG820182 | MW805301 | Peru: Cusco: Paucartambo: Kosñipata |
| *Pristimantis sira* | CORBIDI 14430 |  | MW540610 | MW796232 | MW805302 | Peru: Sira |
| *Pristimantis* cf. *toftae* | TBA | AC 107.07 | KY652659 | KY672991 | KY672974 | Peru: Cusco: Paucartambo: Kosñipata |
| *Pristimantis* sp. | MUSM 31154 |  | KY594759 | KY962787 | KY962767 | Peru: Junín, San Juan de Miraflores |
| *Pristimantis* sp. | CORBIDI 16347 | AC 57.14 | MW540611 | MW796230 | NA | Peru: Cusco: Paucartambo: Kosñipata |
